# Supplementary material for: Improving dietary energy and antioxidative properties benefit early maternal BMI and further manage adverse pregnancy outcomes with better weight gain
Source: Royal Society of Chemistry journal article supplement (doi:10.1039/d4fo06451h), 2025-01-01
Supplement: d4fo06451h1.pdf [file d4fo06451h1.pdf]

## Supplementary Information

H.-Y. Li et al.

### List of Contents

Supplementary Methods

Table S1. The characteristics of dietary status among BMI groups

Table S2. The food source for carbohydrate and protein among BMI groups

Table S3. The intake of micronutrients among BMI groups

Table S4. The proportion of adverse pregnancy events among BMI groups

Table S5. The proportion of abnormal body weight gain among BMI Groups

Supplemental References

## Supplementary Methods

### List of adverse pregnancy events involved in the present study

The terms and classification of adverse pregnancy events are based on the book of *Obstetrics and Gynecology* (version 9, published by People's Medical Publishing House) in China, as well as clinical practice experience and the results of the pregnant woman cohort.

#### 1. Pregnancy complications and comorbidities:

Gestational diabetes mellitus  
Hypertensive disorders of pregnancy  
Morning sickness  
Thyroid disease (hypothyroidism and hyperthyroidism)

#### 2. Abnormal delivery and its complications:

Delivery mode (cesarean section or natural vaginal delivery)  
Birth injury  
Fetal distress  
Premature rupture of fetal membranes  
Postpartum hemorrhage  
Preterm birth

#### 3. Fetal and neonatal abnormalities:

Meconium-stained amniotic fluid  
Neonatal birth weight (macrosomia or low birth weight)

### The multidimensional dietary indexes and conceptions for assessing dietary status

The multidimensional dietary indexes and conceptions for assessing dietary status were selected and calculated referring to *the Dietary Guidelines for Chinese Residents*<sup>1</sup>, *the China Food Composition Database*<sup>2</sup>, *the Dietary Reference Intakes for China*<sup>3</sup>, and previous literature with necessary modifications. In this study, the overall dietary quality and antioxidative property had the most significant results.

#### (1) Dietary quality was reflected by the Chinese Diet Balance Index for Pregnancy (DBI-P)<sup>4-6</sup> accompanied with Diet Quality Distance (DQD), High Bound Score (HBS), and Low Bound Score (LBS).

The DBI-P index was the sum of the scores from each component, and the total score (-74 to 54 points) was used to reflect overall dietary quality. The positive score represented excessive intake, and the negative score represented inadequate intake. Besides, the HBS was the sum of absolute values of positive scores, which reflected the degree of excessive food intake. The LBS was the sum of absolute values of negative scores, which reflected the degree of inadequate food intake. At last, the DQD was the sum of absolute values of both positive and negative scores, which reflected the degree of imbalanced food intake. A lower score of DBI-P-based DQD, HBS, and LBS meant better dietary quality.

For HBS, the total score range was 0 to 54 points, in detail, 0 points = no excessive intake; 1 to 11 points = almost no excessive intake; 11 to 22 points = low level of excessive intake; 22 to 32 points = moderate level of excessive intake; >32 points = high level of excessive intake. For LBS, the total score range was 0 to 74 points, 0 points = no inadequate intake; 1 to 15 points = almost no inadequate intake; 15 to 30 points = low level of inadequate intake; 30 to 44 points = moderate level of inadequate intake; >44 points = high level of inadequate intake. For DQD, the total score range was 0 to 94 points, in detail, 0 points = balanced diet; 1 to 19 points = almost no problem (good dietary intake); 20 to 38 points = low level of imbalanced diet (imbalanced dietary intake); 39 to 56 points = middle level of imbalanced diet (poor dietary intake); >56 points = high level of imbalanced diet (very poor dietary intake). The amount and characteristics of daily food intake were classified into 8 categories as follows:

##### 1) Cereal (involving whole grain) + potato & tuber + mixed bean

The score range of this component was -12 to 12 points, which consisted of -1 to 1 point for whole grain and -11 to 11 points for others. Scoring rules were as follows:

- General cereal intake: 0g = -11 points; 0 < ≤25g = -10 points; 25 < ≤50g = -9 points; 50 < ≤75g = -8 points; 75 < ≤100g = -7 points; 100 < ≤125g = -6 points; 125 < ≤150g = -5 points; 150 < ≤175g = -4 points; 175 < ≤200g = -3 points; 200 < ≤225g = -2 points; 225 < ≤250g = -1 point; 250 ≤ ≤300g = 0 points; 300 < ≤325g = 1 point; 325 < ≤350g = 2 points; 350 < ≤375g = 3 points; 375 < ≤400g = 4 points; 400 < ≤425g = 5 points; 425 < ≤450g = 6 points; 450 < ≤475g = 7 points; 475 < ≤500g = 8 points; 500 < ≤525g = 9 points; 525 < ≤550g = 10 points; 550g ≤ = 11 points.
- Whole grain intake: 0 ≤ <75g = -1 point; 75 ≤ ≤100g = 0 points; 100g ≤ = 1 point.

##### 2) Vegetables + fruits

The score range of this component was -14 to 0 points, which consisted of -6 to 0 points for vegetables and -8 to 0 points for fruits. Scoring rules were as follows:

- Vegetable intake:  $0 \leq <50\text{g} = -6$  points;  $50 \leq <100\text{g} = -5$  points;  $100 \leq <150\text{g} = -4$  points;  $150 \leq <200\text{g} = -3$  points;  $200 \leq <250\text{g} = -2$  points;  $250 \leq <300\text{g} = -1$  point;  $300\text{g} \leq = 0$  points.
- Fruit intake:  $0 \leq <25\text{g} = -8$  points;  $25 \leq <50\text{g} = -7$  points;  $50 \leq <75\text{g} = -6$  points;  $75 \leq <100\text{g} = -5$  points;  $100 \leq <125\text{g} = -4$  points;  $125 \leq <150\text{g} = -3$  points;  $150 \leq <175\text{g} = -2$  points;  $175 \leq <200\text{g} = -1$  point;  $200\text{g} \leq = 0$  points.

3) Dairy, soybeans, and nuts intake

The score range of this component was -12 to 0 points, which consisted of -6 to 0 points for dairy and -6 to 0 points for soybeans and nuts. Scoring rules were as follows:

- Dairy intake:  $0 \leq <50\text{g} = -6$  points;  $50 \leq <100\text{g} = -5$  points;  $100 \leq <150\text{g} = -4$  points;  $150 \leq <200\text{g} = -3$  points;  $200 \leq <250\text{g} = -2$  points;  $250 \leq <300\text{g} = -1$  points;  $300\text{g} \leq = 0$  points.
- Fruit intake:  $0\text{g} = -6$  points;  $0 < \leq 5\text{g} = -5$  points;  $5 < \leq 10\text{g} = -4$  points;  $10 < \leq 15\text{g} = -3$  points;  $15 < \leq 20\text{g} = -2$  points;  $20 < < 25\text{g} = -1$  point;  $25\text{g} \leq = 0$  points.

4) Animal food (such as meat and poultry, fish and shrimp, and egg)

The score range of this component was -12 to 12 points, which consisted of -4 to 4 points for meat and poultry, -4 to 4 points for fish and shrimp, and -4 to 4 points for egg. Scoring rules were as follows:

- Meat and poultry intake:  $0 \leq <8\text{g} = -4$  points;  $8 \leq <16\text{g} = -3$  points;  $16 \leq <32\text{g} = -2$  points;  $32 \leq <40\text{g} = -1$  point;  $40 \leq \leq 65\text{g} = 0$  points;  $65 < \leq 80\text{g} = 1$  point;  $80 < \leq 95\text{g} = 2$  points;  $95 < \leq 110\text{g} = 3$  points;  $110\text{g} < = 4$  points.
- Fish and shrimp intake:  $0 \leq <8\text{g} = -4$  points;  $8 \leq <16\text{g} = -3$  points;  $16 \leq <32\text{g} = -2$  points;  $32 \leq <40\text{g} = -1$  point;  $40 \leq \leq 65\text{g} = 0$  points;  $65 < \leq 80\text{g} = 1$  point;  $80 < \leq 95\text{g} = 2$  points;  $95 < \leq 110\text{g} = 3$  points;  $110\text{g} < = 4$  points.
- Egg intake:  $0 \leq <12.5\text{g} = -4$  points;  $12.5 \leq <25\text{g} = -3$  points;  $25 \leq <37.5\text{g} = -2$  points;  $37.5 \leq <50\text{g} = -1$  point;  $50\text{g} = 0$  points;  $50 < \leq 62.5\text{g} = 1$  point;  $62.5 < \leq 75\text{g} = 2$  points;  $75 < \leq 87.5\text{g} = 3$  points;  $87.5\text{g} < = 4$  points.

5) Pure energy food (such as cooking oil, and alcoholic beverages been drunk by mistake)

The score range of this component was 0 to 12 points, which consisted of 0 to 6 points for cooking oil, and 0 to 6 points for alcoholic beverages. Scoring rules were as follows:

- Cooking oil intake:  $\leq 25\text{g} = 0$  points;  $25 < \leq 30\text{g} = 1$  point;  $30 < \leq 35\text{g} = 2$  points;  $35 < \leq 40\text{g} = 3$  points;  $40 < \leq 45\text{g} = 4$  points;  $45 < \leq 50\text{g} = 5$  points;  $50\text{g} < = 6$  points.
- Alcoholic beverage intake:  $0\text{g} = 0$  points;  $0 < \leq 10\text{g} = 1$  point;  $10 < \leq 20\text{g} = 2$  points;  $20 < \leq 30\text{g} = 3$  points;  $30 < \leq 40\text{g} = 4$  points;  $40 < \leq 50\text{g} = 5$  points;  $50\text{g} < = 6$  points.

6) Condiments (like salt)

The score range of this component was 0 to 6 points. Scoring rules were as follows:

- Salt intake:  $\leq 5\text{g} = 0$  points;  $5 < \leq 6\text{g} = 1$  point;  $6 < \leq 7\text{g} = 2$  points;  $7 < \leq 8\text{g} = 3$  points;  $8 < \leq 9\text{g} = 4$  points;  $9 < \leq 10\text{g} = 5$  points;  $10\text{g} < = 6$  points.

7) Diet variety (including 12 categories of foods)

The score range of this component was -12 to 0 points. Scoring rules were as follows:

- rice and products ( $<25\text{g} = -1$  point;  $25\text{g} \geq = 0$  points);
- wheat and products ( $<25\text{g} = -1$  point;  $25\text{g} \geq = 0$  points);
- corn, coarse grains and products, starchy roots and products ( $<25\text{g} = -1$  point;  $25\text{g} \geq = 0$  points);
- dark-colored vegetables ( $<25\text{g} = -1$  point;  $25\text{g} \geq = 0$  points);
- light-colored vegetables ( $<25\text{g} = -1$  point;  $25\text{g} \geq = 0$  points);
- fruit ( $<25\text{g} = -1$  point;  $25\text{g} \geq = 0$  points);
- soybeans and nuts (soybeans  $\geq 5\text{g}$  meanwhile nuts  $\geq 25\text{g} = 0$  points, otherwise  $= -1$  point);
- milk and dairy products ( $<25\text{g} = -1$  point;  $25\text{g} \geq = 0$  points);
- red meat and products ( $<25\text{g} = -1$  point;  $25\text{g} \geq = 0$  points);
- poultry and game ( $<25\text{g} = -1$  point;  $25\text{g} \geq = 0$  points);
- egg ( $<25\text{g} = -1$  point;  $25\text{g} \geq = 0$  points);
- fish and shellfish ( $<25\text{g} = -1$  point;  $25\text{g} \geq = 0$  points).

8) Drinking water

The score range of this component was -12 to 12 points. Scoring rules were as follows:

- Water intake:  $0\text{ mL} = -12$  points;  $0 < \leq 125\text{mL} = -11$  points;  $125 < \leq 250\text{mL} = -10$  points;  $250 < \leq 375\text{mL} = -9$  points;  $375 < \leq 500\text{mL} = -8$  points;  $500 < \leq 625\text{mL} = -7$  points;  $625 < \leq 750\text{mL} = -6$  points;  $750 < \leq 875\text{mL} = -5$  points;  $875 < \leq 1000\text{mL} = -4$  points;  $1000 < \leq 1125\text{mL} = -3$  points;  $1125 < \leq 1250\text{mL} = -2$  points;  $1250 < \leq 1500\text{mL} = -1$  point;  $1500 < \leq 1700\text{mL} = 0$  points;  $1700 < \leq 1900\text{mL} = 1$  point;  $1900 < \leq 2100\text{mL} = 2$  points;  $2100 < \leq 2300\text{mL} = 3$  points;  $2300 < \leq 2500\text{mL} = 4$  points;  $2500 < \leq 2700\text{mL} = 5$  points;  $2700 < \leq 2900\text{mL} = 6$  points;  $2900 < \leq 3100\text{mL} = 7$  points;  $3100 < \leq 3300\text{mL} = 8$  points;  $3300 < \leq 3500\text{mL} = 9$  points;  $3500 < \leq 3700\text{mL} = 10$  points;  $3700 < \leq 3900\text{mL} = 11$  points;  $3900\text{mL} < = 12$  points.

(2) **Dietary antioxidative property** was reflected by the **Dietary Antioxidant Quality Score (DAQS)**<sup>7-9</sup>.

The DAQS index was the sum of the scores from each component. The daily intake of vitamin A, vitamin C, vitamin E, selenium, zinc, and manganese was calculated. If the intake of these micronutrients was above 2/3 of the dietary reference intakes for Chinese pregnant women, the component would be given 1 point, otherwise, it would be deemed as 0 points. A higher score of DAQS meant a better dietary quality and antioxidative property. The final score was 0 points = very poor quality; 1 to 2 points = low quality; 3 to 4 points = average quality; 5 to 6 points = high quality. The dietary reference intakes of these micronutrients for Chinese pregnant women were as follows:

- 1) Vitamin A = 660  $\mu$ g RAE/d, and the 2/3 of that = 440 $\mu$ g RAE/d.
- 2) Vitamin C = 100 mg/d, and the 2/3 of that = 2/3=66.67 mg/d.
- 3) Vitamin E = 14 mg  $\alpha$ -TE/d, and the 2/3 of that = 9.33 mg  $\alpha$ -TE/d.
- 4) Selenium = 65  $\mu$ g/d, and the 2/3 of that = 43.33  $\mu$ g/d
- 5) Zinc = 10.5 mg/d, and the 2/3 of that = 7 mg/d
- 6) Manganese = 4.0 mg/d, and the 2/3 of that = 2.67 mg/d.

**(3) Adherence of participants to dietary guidelines** was reflected by the **Chinese Dietary Guidelines Compliance Index for Pregnant Women (CDGCI-PW)**.<sup>10, 11</sup>

The DAQS index was calculated by the sum of the score from 13 questions as follows. A higher CDGCI-PW score meant better compliance with the Chinese dietary guidelines for pregnant women.

- 1) How many categories of food do you eat per week on average?
  - $\leq$ 6 categories = 0 points;
  - 7 to 10 categories = 5 to 20 points (5 points for each additional category);
  - $\geq$ 11 categories = 25 points.
- 2) How many types of foods do you eat per day on average?
  - $\leq$ 4 kinds = 0 points;
  - 5 to 11 kinds = 1 to 7 points (1 point for each additional kind);
  - 11 to 20 kinds = 9 to 25 points (2 points for each additional kind);
  - $\geq$ 20 kinds = 25 points.
- 3) Does your daily intake of staple food reach 150g on average?
  - No = 0 points; Yes = 5 points.
- 4) Do you take 400 $\mu$ g of folic acid per day on average?
  - No = 0 points; Yes = 5 points.
- 5) Do you eat more than 200g of green-leafy and colored vegetables (red and yellow) per day on average? (raw weight)
  - No = 0 points; Yes = 5 points.
- 6) How often do you drink milk and its products per week on average? (one serving = 250mL)
  - Less than or equal to once a week ( $\leq$ 250 mL) = 0 points;
  - Range from 2 to 4 times per week (500-1000 mL) = 1 to 3 points (1 point for each additional time per week);
  - More than or equal to 5 times per week ( $\geq$ 1250 mL) = 4 points.
- 7) How often do you eat soybeans and soybean products per week on average? (one serving = 15g dry soybeans.
  - $\leq$ 1 time = 0 points;
  - 2 to 4 times = 1 to 3 points (1 point for each additional time per week);
  - $\geq$ 5 times per week = 4 points.
- 8) Do you eat 100g of lean meat (livestock and poultry meat), aquatic products (fish, shrimp, and shellfish), or eggs per day on average?
  - No = 0 points; Yes = 4 points
- 9) How often do you eat nuts per week on average? (one serving = 10 g dry nuts)
  - $\leq$ 1 time = 0 points;
  - 2 to 4 times per week = 1 to 3 points (1 point for each additional time per week);
  - $\geq$ 5 times per week = 4 points.
- 10) How often do you eat animal blood and liver per week on average? (one serving = 50g)
  - Never eat = 0 points;
  - 1 time = 3 points;
  - $\geq$ 2 times = 5 points.

- 11) Do you eat iodized salt every day?
  - No = 0 points; Yes = 5 points.
- 12) How often do you eat iodine-rich seafood per week on average?
  - ≤1 time (≤150g) = 0 points;
  - 2 to 4 times (300-600g) = 1 to 3 points (1 point for each additional time per week);
  - ≥5 times (≥600g) = 4 points.
- 13) Do you often eat foods high in oil, salt, and sugar?
  - Yes = 0 points; No = 5 points.

**(4) Eating habit was reflected by the Chinese Healthy Diet Index for Pregnancy (CHDI-P).<sup>12, 13</sup>**

The CHDI-P index was calculated by the sum of the scores from each component. A higher CHDI-P score meant a better eating habit with good diet quality and nutritional status.

- 1) Category of food intake/day (1 point for each species)
  - Grains, Tubers and Mixed beans: recommended number of species = 3, score = 0-3 points;
  - Vegetables and Fruits: recommended number of species = 4, score = 0-4 points;
  - Meat, Poultry, Fish, and Eggs: recommended number of species = 3, score = 0-3 points;
  - Dairy, Soybeans and Nuts: recommended number of species = 2, score = 0-2 points;
  - Total: recommended number of species = 12, score = 0-12 points.
- 2) Intake/day of food should be adequacy
  - Whole grains/Mixed beans: 0g = 0 points; 0-50g = 3 points; ≥50 = 6 points;
  - Tubers: 0g = 0 points; 0-50g = 0.5 point; ≥50 = 1 point;
  - Poultry: 0g = 0 points; 0-40g = 1.5 points; ≥40 = 3 points;
  - Fish and seafood: 0g = 0 points; 0-40g = 1.5 points; ≥40 = 3 points;
  - Eggs: 0g = 0 points; 0-40g = 1.5 points; ≥40 = 3 points;
  - Dairy: 0g = 0 points; 0-300g = 1.5 points; ≥300 = 3 points;
  - Soybeans: 0g = 0 points; 0-15g = 1.5 points; ≥300 = 3 points;
  - Animal liver: 0 or ≥50g = 0 points; 0-25g = 1.5 points; 25≤ ≤50 = 3 points;
  - Animal blood: 0 or ≥50g = 0 points; 0-25g = 1.5 points; 25≤ ≤50 = 3 points;
  - Red meats: 0 or ≥100g = 0 points; 0-50g = 1.5 points; 50≤ ≤100 = 3 points;
  - Dark-colored vegetables: 0g = 0 points; 0-200g = 3 points; ≥200 = 6 points;
  - Fruits: 0 or ≥350g = 0 points; 0-200g = 1.5 points; 200≤ ≤350 = 3 points;
  - Marine algae: 0g = 0 points; 0-20g = 1.5 points; ≥20 = 3 points;
  - Iodized salt: 0 or ≥15g = 0 points; 6-15g = 1.5 points; 0< ≤6 = 3 points;
  - Nuts: 0g = 0 points; 0-10g = 1.5 points; ≥10 = 3 points;
  - Folic acid supplements: 0g = 0 points; 0-400μg = 3 points; ≥400μg = 6 points.
- 3) Intake/day of food needs to be limited
  - Fried foods: ≥200g = 0 points; 0-200g = 2.75 points; 0g = 5.5 points;
  - Sugary beverages: ≥400g = 0 points; 0-400g = 2.75 points; 0g = 5.5 points;
  - Alcohol: >0g = 0 points; 0g = 5.5 points;
  - Refined grains: 170< or ≥450g = 0 points; 170-450g = 5.5 points;
  - Cooking oil: 0 or >50g = 0 points; 25-50g = 2.75 points; 0-25g = 5.5 points.

**(5) Consistency of participants' dietary patterns with the DASH model was reflected by the Dietary Approaches to Stop Hypertension Diet Score (DASH score).<sup>14-16</sup>**

The DASH score was calculated by the sum of the scores from each component. Based on a 2100 kcal diet, scoring rules were established as follows, and a final score ≥ 4.5 was deemed as good DASH accordant.

- 1) *Energy intake from saturated fat: <6% = 1 point; 6%≤ <11% = 0.5 point; 11%≤ = 0 points;*
- 2) *Energy intake from total fat: <27% = 1 point; 27%≤ <32% = 0.5 point; 32%≤ = 0 points;*
- 3) *Energy intake from protein: >18% = 1 point; 16.5%< ≤18% = 0.5 point; 16.5%≤ = 0 points;*
- 4) *Cholesterol intake: <71.4mg/1000kcal = 1 point; 71.4≤ <107.1mg/1000kcal = 0.5 point; ≥107.1 mg/1000kcal = 0 points;*
- 5) *Fiber intake: >14.8g/1000kcal = 1 point; 9.5< ≤14.8g/1000kcal = 0.5 point; 9.5g/1000kcal≤ = 0 points;*
- 6) *Magnesium intake: >238mg/1000kcal = 1 point; 158< ≤238mg/1000kcal = 0.5 point; 158mg/1000kcal≤ = 0 points;*
- 7) *Calcium intake: >590mg/1000kcal = 1 point; 402< ≤590 mg/1000kcal = 0.5 point; 402mg/1000kcal≤ = 0 points;*

- 8) Potassium intake:  $>2238\text{mg}/1000\text{kcal} = 1 \text{ point}$ ;  $1534 < \leq 2238\text{mg}/1000\text{kcal} = 0.5 \text{ point}$ ;  $1534\text{mg}/1000\text{kcal} \leq = 0 \text{ points}$ ;
- 9) Sodium intake:  $<1143\text{mg}/1000\text{kcal} = 1 \text{ point}$ ;  $1143 \leq < 1286\text{mg}/1000\text{kcal} = 0.5 \text{ point}$ ;  $1286\text{mg}/1000\text{kcal} \leq = 0 \text{ points}$ .

**(6) Dietary anti-inflammatory potential** was reflected by the **Energy-Adjusted Dietary Inflammatory Index (E-DII)**.<sup>17-19</sup>

The E-DII index was calculated by the sum of the inflammatory effect score from each component. A higher positive score meant a stronger pro-inflammatory potential, while a lower negative score meant a stronger anti-inflammatory potential. Referring to previous literature on E-DII calculation and the China Food Composition Database<sup>2</sup>, the inflammatory effect score of 30 types of nutrients and foods were evaluated, including:

1) Alcohol, 2) b-Carotene, 3) Caffeine, 4) Carbohydrate, 5) Cholesterol, 6) Energy, 7) Total fat, 8) Fiber, 9) Folic acid, 10) Garlic, 11) Fe, 12) Mg, 13) MUFA, 14) Niacin, 15) Onion, 16) Protein, 17) PUFA, 18) Riboflavin, 19) Saturated fat, 20) Se, 21) Thiamin, 22) Vitamin A, 23) Vitamin C, 24) Vitamin E, 25) Zn, 26) Green/black tea, 27) Flavones, 28) Flavonols, 29) Anthocyanidins, 30) Isoflavones.

First, the energy-adjusted coefficient of each participant was calculated [energy-adjusted coefficient = total energy intake/1000].

Secondly, the energy-adjusted intake was assessed [energy-adjusted intake = the total intake amount/energy-adjusted coefficient]

Thirdly, the Z-score of nutrients was evaluated [Z-score = (the energy-adjusted intake – global daily mean intake)/its standard deviation]. The global daily mean intake of each nutrient and food, as well as related standard deviation, had been studied and reported in previous literature.<sup>17-19</sup>

Fourthly, the Z-score was converted to a percentile score via the NORMSDIST in Excel software to minimize the effect of the right skewing.

Fifthly, each percentile score was doubled, and then subtracted 1 to achieve a symmetrical distribution with values centered on 0 and bounded between 21 (maximally anti-inflammatory) and 11 (maximally pro-inflammatory).

At last, the nutrient and food-specific DII score was calculated by multiplying the centered percentile score and its respective overall inflammatory effect score. The overall inflammatory effect score of each nutrient and food had been studied and reported in previous literature.<sup>17-19</sup>

**(7) Adequacy of micronutrients** was reflected by the **Mean Nutrient Adequacy Ratio (MAR)**.<sup>20</sup>

First, the nutrient adequacy ratio (NAR) of each micronutrient was evaluated [NAR = the actual intake of each micronutrient / the dietary reference intakes of each micronutrient for the corresponding pregnancy]. The NARs were truncated at 1 to avoid when the nutrient with a low NAR could be compensated by another nutrient with a high NAR. Then, the MAR was equal to the mean of all NAR. A higher score meant better adequacy.

**(8) Dietary diversity** was reflected by the **Minimum Dietary Diversity for Women (MDD-W)**.<sup>20, 21</sup>

The MDD-W index was the sum of the scores from each component. A higher score meant better dietary diversity. Food intake was classified into 10 categories: 1) Staple foods (grains, white roots, tubers, and plantains), 2) Pulses (beans, peas and lentils), 3) Nuts and seeds, 4) Dairy, 5) Fleshy foods (meat, poultry, and fish), 6) Eggs, 7) Dark green leafy vegetables, 8) Other vitamin A-rich fruits and vegetables, 9) Other vegetables, 10) Other fruits. Any kind of food category intake of more than 15g during the last 24 hours was deemed as 1 point, so each participant had a minimum of 0 and a maximum of 10 points could be obtained.

**Table S1. The characteristics of dietary status among BMI groups**

| Dietary characteristics       | Normal<br>[as control] | Obesity                | <i>P</i><br>value | Overweight             | <i>P</i><br>value | Underweight            | <i>P</i><br>value |
|-------------------------------|------------------------|------------------------|-------------------|------------------------|-------------------|------------------------|-------------------|
| <b>DASH score (n, %)</b>      |                        |                        |                   |                        |                   |                        |                   |
| Not meeting DASH pattern      | 416 (37.58%)           | 45 (33.58%)            | >0.05             | 143 (36.29%)           | >0.05             | 57 (38.00%)            | >0.05             |
| Meeting DASH pattern          | 691 (62.42%)           | 89 (66.42%)            | >0.05             | 251 (63.71%)           | >0.05             | 93 (62.00%)            | >0.05             |
| total                         | 1107 (100%)            | 134 (100%)             | >0.05             | 394 (100%)             | >0.05             | 150 (100%)             | >0.05             |
| <b>CDGCI-PW (median, IQR)</b> | 48.00<br>(42.00-54.00) | 47.00<br>(42.75-53.25) | 0.885             | 48.00<br>(42.00-53.00) | 0.859             | 47.00<br>(40.00-53.00) | 0.251             |
| <b>CHDI-P (median, IQR)</b>   | 56.00<br>(51.25-60.75) | 55.63<br>(51.50-60.25) | 0.705             | 55.88<br>(50.44-61.00) | 0.620             | 54.25<br>(49.69-60.50) | 0.059             |
| <b>E-DII (median, IQR)</b>    | 0.30<br>(-1.47-2.11)   | -0.10<br>(-1.56-1.76)  | 0.409             | 0.27<br>(-1.74-2.34)   | 0.860             | 0.61<br>(-1.58-2.74)   | 0.341             |
| <b>MDD-W (median, IQR)</b>    | 8.00<br>(7.00-9.00)    | 8.00<br>(8.00-9.00)    | 0.572             | 8.00<br>(7.00-9.00)    | 0.996             | 8.00 (7.00-9.00)       | 0.010             |
| <b>MAR (median, IQR)</b>      | 0.89<br>(0.82-0.93)    | 0.92<br>(0.84-0.94)    | 0.003             | 0.89<br>(0.83-0.93)    | 0.194             | 0.88 (0.79-0.92)       | 0.152             |

Data were presented as median (IQR) or counts with proportion (%). Abbreviations: CDGCI-PW, Chinese dietary guidelines compliance index for pregnant women; CHDI-P, Chinese healthy diet index for pregnancy; DASH score, Dietary approaches to stop hypertension diet score; E-DII, energy-adjusted dietary inflammatory index; MDD-W, minimum dietary diversity for women; MAR, mean of nutrient adequacy ratio.

**Table S2. The food source for carbohydrate and protein among BMI groups**

| <b>Food source</b>                                      | <b>Normal [as control]</b> | <b>Obesity</b>        | <b>P value</b> | <b>Overweight</b>     | <b>P value</b> | <b>Underweight</b>    | <b>P value</b> |
|---------------------------------------------------------|----------------------------|-----------------------|----------------|-----------------------|----------------|-----------------------|----------------|
| <b>Overall high-quality carbohydrate intake (g/day)</b> | 84.53 (51.26-137.44)       | 110.25 (62.36-161.60) | 0.006          | 90.92 (52.85-154.42)  | 0.087          | 88.67 (46.53-146.69)  | 0.728          |
| High-quality carbohydrate from whole grains             | 10.21 (2.55-25.82)         | 10.47 (2.99-25.40)    | 0.878          | 10.82 (3.11-29.98)    | 0.288          | 7.66 (2.38-24.89)     | 0.355          |
| High-quality carbohydrate from fruits                   | 12.95 (6.01-24.26)         | 12.71 (6.45-26.06)    | 0.762          | 11.60 (5.92-23.27)    | 0.155          | 12.48 (5.28-27.93)    | 0.866          |
| High-quality carbohydrate from legumes                  | 6.89 (2.65-15.18)          | 7.41 (2.73-18.10)     | 0.559          | 6.65 (2.33-15.82)     | 0.852          | 5.22 (1.51-12.42)     | 0.016          |
| High-quality carbohydrate from non-starchy vegetables   | 39.01 (19.02-70.80)        | 54.62 (24.07-92.13)   | 0.001          | 42.04 (20.42-83.24)   | 0.051          | 36.94 (20.26-69.94)   | 0.655          |
| <b>Overall low-quality carbohydrate intake (g/day)</b>  | 125.29 (85.59-184.40)      | 136.67 (81.42-186.49) | 0.600          | 128.50 (83.71-193.50) | 0.794          | 119.39 (82.11-176.09) | 0.467          |
| Low-quality carbohydrate from refined grain             | 80.17 (50.06-117.81)       | 75.00 (44.54-113.33)  | 0.387          | 75.53 (45.50-117.62)  | 0.312          | 76.66 (49.54-111.05)  | 0.490          |
| Low-quality carbohydrate from potato                    | 2.77 (0.69-6.93)           | 2.37 (1.08-4.68)      | 0.485          | 2.31 (0.54-6.93)      | 0.488          | 2.31 (0.46-6.93)      | 0.694          |
| Low-quality carbohydrate from other starchy vegetables  | 1.48 (0.00-4.76)           | 0.93 (0.00-4.45)      | 0.471          | 1.48 (0.00-3.22)      | 0.413          | 1.30 (0.00-3.18)      | 0.403          |
| Low-quality carbohydrate from added sugars              | 0.00 (0.00-7.40)           | 0.00 (0.00-20.09)     | 0.065          | 0.00 (0.00-8.46)      | 0.350          | 0.00 (0.00-8.87)      | 0.322          |
| Low-quality carbohydrate from fruit juices              | 0.00 (0.00-1.06)           | 0.00 (0.00-1.10)      | 0.572          | 0.00 (0.00-0.99)      | 0.301          | 0.00 (0.00-1.23)      | 0.864          |
| Low-quality carbohydrate from residual carbohydrates    | 20.60 (11.63-35.95)        | 24.40 (12.09-40.70)   | 0.223          | 21.67 (12.92-41.35)   | 0.220          | 17.99 (9.14-33.78)    | 0.121          |
| <b>Overall animal protein intake (g/day)</b>            | 49.17 (27.32-85.83)        | 60.35 (33.02-94.18)   | 0.023          | 54.50 (29.30-93.97)   | 0.215          | 40.63 (21.37-77.81)   | 0.062          |
| Animal protein from seafood                             | 1.68 (0.58-3.52)           | 1.68 (0.48-4.52)      | 0.775          | 1.75 (0.61-4.13)      | 0.376          | 1.51 (0.38-3.96)      | 0.580          |
| Animal protein from unprocessed red meat                | 6.50 (2.66-12.76)          | 7.41 (3.76-18.14)     | 0.049          | 7.08 (2.81-14.18)     | 0.385          | 5.40 (2.25-11.33)     | 0.238          |
| Animal protein from processed meat                      | 0.00 (0.00-1.36)           | 0.00 (0.00-2.72)      | 0.625          | 0.00 (0.00-2.72)      | 0.085          | 0.00 (0.00-2.72)      | 0.463          |
| Animal protein from poultry                             | 17.35 (4.35-49.96)         | 27.79 (8.19-53.18)    | 0.071          | 19.90 (5.83-50.79)    | 0.523          | 16.65 (3.87-39.34)    | 0.354          |
| Animal protein from egg                                 | 5.85 (3.34-8.19)           | 5.85 (3.51-8.19)      | 0.460          | 5.85 (4.11-8.19)      | 0.417          | 4.18 (1.67-6.72)      | <0.001         |
| Animal protein from dairy                               | 4.93 (1.91-8.14)           | 5.94 (2.09-8.58)      | 0.329          | 4.78 (2.06-8.03)      | 0.757          | 4.25 (1.30-7.71)      | 0.202          |
| Animal protein from other sources                       | 0.00 (0.00-0.11)           | 0.00 (0.00-0.12)      | 0.876          | 0.00 (0.00-0.16)      | 0.434          | 0.00 (0.00-0.13)      | 0.802          |
| <b>Overall plant protein intake (g/day)</b>             | 45.36 (30.23-70.52)        | 50.65 (33.67-72.55)   | 0.093          | 46.93 (30.28-76.01)   | 0.205          | 43.49 (27.62-66.83)   | 0.275          |
| Plant protein from whole grain                          | 1.36 (0.34-3.56)           | 1.39 (0.40-3.55)      | 0.899          | 1.47 (0.42-4.09)      | 0.298          | 1.02 (0.32-3.40)      | 0.349          |
| Plant protein from refined grain                        | 9.60 (5.86-14.37)          | 9.17 (5.20-13.44)     | 0.367          | 9.12 (5.39-14.39)     | 0.349          | 9.23 (5.93-13.88)     | 0.489          |
| Plant protein from nuts                                 | 0.93 (0.07-2.17)           | 0.78 (0.00-2.43)      | 0.537          | 0.79 (0.04-2.17)      | 0.644          | 0.62 (0.00-1.85)      | 0.056          |
| Plant protein from legumes                              | 6.22 (2.63-11.75)          | 5.96 (2.75-12.74)     | 0.954          | 6.15 (2.33-12.78)     | 0.871          | 4.54 (1.49-11.47)     | 0.023          |
| Plant protein from other sources                        | 20.90 (10.84-36.53)        | 26.33 (12.97-45.17)   | 0.019          | 22.33 (11.16-40.86)   | 0.096          | 20.32 (11.06-39.70)   | 0.982          |

Data were presented as median (IQR). The categories of food source were referred to previous literature.<sup>22-24</sup>

**Table S3. The intake of micronutrients among BMI groups**



| <b>Micronutrients</b>                                          | <b>Normal [as control]</b> | <b>Obesity</b>             | <b>P value</b> | <b>Overweight</b>           | <b>P value</b> | <b>Underweight</b>          | <b>P value</b> |
|----------------------------------------------------------------|----------------------------|----------------------------|----------------|-----------------------------|----------------|-----------------------------|----------------|
| <b>Vitamins [median (IQR)]</b>                                 |                            |                            |                |                             |                |                             |                |
| Vitamin A (µgRE/day)                                           | 2074.06 (1090.01-3522.47)  | 2795.40 (1384.16-5121.40)  | 0.008          | 2367.67 (1078.28-4344.68)   | 0.105          | 2032.09 (1021.08-3609.55)   | 0.791          |
| Total carotene (µg/day)                                        | 9910.83 (4622.45-18148.01) | 14394.1 (5128.62-28552.98) | 0.031          | 11064.93 (4567.87-22244.52) | 0.212          | 10647.98 (4658.02-18162.31) | 0.835          |
| Retinol (µg/day)                                               | 283.89 (171.48-450.57)     | 293.40 (205.76-518.42)     | 0.068          | 286.43 (167.02-480.85)      | 0.589          | 249.135 (114.81-401.94)     | 0.031          |
| Vitamin B1 (mg/day)                                            | 1.12 (0.75-1.59)           | 1.29 (0.78-1.93)           | 0.014          | 1.22 (0.83-1.80)            | 0.029          | 0.94 (0.65-1.66)            | 0.068          |
| Vitamin B2 (mg/day)                                            | 1.94 (1.24-2.86)           | 2.44 (1.41-3.77)           | 0.001          | 2.02 (1.30-3.23)            | 0.044          | 1.73 (1.06-2.82)            | 0.142          |
| Vitamin B3 (mg/day)                                            | 22.65 (14.23-35.57)        | 26.90 (17.85-44.04)        | 0.003          | 24.98 (16.08-38.82)         | 0.051          | 20.27 (12.84-33.13)         | 0.110          |
| Vitamin B9 (µg/day)                                            | 215.34 (132.76-332.73)     | 256.37 (157.70-380.95)     | 0.012          | 232.11 (139.17-388.09)      | 0.117          | 211.18 (119.81-323.09)      | 0.270          |
| Vitamin C (mg/day)                                             | 328.75 (171.17-587.96)     | 446.59 (202.81-828.19)     | 0.002          | 361.27 (175.04-688.48)      | 0.135          | 342.94 (169.09-614.51)      | 0.770          |
| Vitamin E (mg/day)                                             | 24.07 (15.06-36.96)        | 29.65 (19.69-42.91)        | 0.003          | 25.30 (16.19-40.72)         | 0.066          | 21.85 (12.83-35.42)         | 0.204          |
| α-Vitamin E (mg/day)                                           | 12.21 (7.21-19.43)         | 15.69 (9.38-25.58)         | 0.000          | 12.64 (7.60-22.05)          | 0.063          | 11.44 (6.88-19.02)          | 0.398          |
| <b>Minerals [median (IQR)]</b>                                 |                            |                            |                |                             |                |                             |                |
| Ca (mg/day)                                                    | 1156.82 (690.65-1875.36)   | 1440.89 (810.36-2377.82)   | 0.005          | 1192.33 (694.73-2158.92)    | 0.100          | 1155.72 (600.70-1811.91)    | 0.569          |
| P (mg/day)                                                     | 1565.73 (1052.81-2248.74)  | 1853.01 (1131.24-2796.67)  | 0.006          | 1634.97 (1116.91-2546.29)   | 0.048          | 1381.88 (910.44-2369.12)    | 0.096          |
| K (mg/day)                                                     | 4183.10 (2561.51-6760.41)  | 5409.77 (3046.35-7807.33)  | 0.003          | 4599.09 (2728.78-7486.89)   | 0.059          | 4073.79 (2462.21-6900.21)   | 0.497          |
| Na (mg/day)                                                    | 1601.27 (983.35-2693.68)   | 2127.57 (1067.93-2920.02)  | 0.025          | 1882.31 (1051.42-2909.27)   | 0.035          | 1494.41 (881.51-2436.26)    | 0.398          |
| Mg (mg/day)                                                    | 541.47 (337.24-887.54)     | 647.83 (421.63-1018.42)    | 0.011          | 576.46 (348.58-986.54)      | 0.073          | 533.87 (316.35-896.30)      | 0.539          |
| Fe (mg/day)                                                    | 34.45 (21.97-50.01)        | 40.26 (24.63-58.88)        | 0.007          | 36.62 (22.54-58.14)         | 0.028          | 32.70 (20.00-51.72)         | 0.331          |
| Zn (mg/day)                                                    | 15.26 (10.25-22.17)        | 18.29 (10.93-28.50)        | 0.004          | 16.78 (10.95-25.18)         | 0.022          | 13.04 (9.45-23.29)          | 0.133          |
| Se (µg/day)                                                    | 65.73 (42.20-100.23)       | 75.31 (48.61-115.36)       | 0.021          | 68.94 (45.35-109.81)        | 0.208          | 61.61 (34.28-99.68)         | 0.103          |
| Cu (mg/day)                                                    | 2.62 (1.82-3.73)           | 3.00 (1.98-4.45)           | 0.010          | 2.85 (1.93-4.17)            | 0.039          | 2.28 (1.54-4.12)            | 0.155          |
| Mn (mg/day)                                                    | 6.16 (4.12-9.33)           | 7.25 (4.51-10.58)          | 0.023          | 6.64 (4.23-10.50)           | 0.074          | 5.99 (3.87-9.59)            | 0.444          |
| <b>Phytochemicals and other food components [median (IQR)]</b> |                            |                            |                |                             |                |                             |                |
| Dietary fiber (g/day)                                          | 23.60 (13.21-37.11)        | 30.03 (15.67-49.58)        | 0.003          | 24.85 (13.92-44.28)         | 0.068          | 21.45 (12.34-36.92)         | 0.413          |
| Caffeine (mg/day)                                              | 0.00 (0.00-9.40)           | 0.00 (0.00-19.36)          | 0.548          | 0.00 (0.00-10.74)           | 0.810          | 0.00 (0.00-6.39)            | 0.953          |
| Flavones (mg/day)                                              | 7.47 (4.47-11.76)          | 7.89 (4.44-12.14)          | 0.311          | 7.09 (4.67-12.13)           | 0.800          | 6.87 (4.08-12.45)           | 0.294          |
| Luteolin (mg/day)                                              | 5.92 (3.61-9.69)           | 6.71 (4.12-9.82)           | 0.181          | 5.83 (3.74-9.64)            | 0.911          | 5.45 (3.09-9.94)            | 0.277          |
| Apigenin (mg/day)                                              | 8.28 (4.86-13.18)          | 8.27 (4.97-13.61)          | 0.478          | 7.65 (5.14-13.78)           | 0.602          | 8.00 (4.32-13.53)           | 0.348          |
| Flavonols (mg/day)                                             | 21.40 (12.96-33.29)        | 22.45 (14.18-34.70)        | 0.340          | 20.63 (13.06-33.06)         | 0.734          | 20.08 (11.00-34.01)         | 0.350          |
| Quercetin (mg/day)                                             | 11.80 (7.49-19.30)         | 14.16 (7.76-21.37)         | 0.024          | 12.20 (7.51-20.19)          | 0.477          | 11.32 (5.97-18.38)          | 0.268          |
| Myricetin (mg/day)                                             | 45.25 (26.14-69.45)        | 45.38 (26.00-72.47)        | 0.678          | 41.81 (26.49-68.72)         | 0.411          | 41.21 (22.82-71.43)         | 0.401          |
| Kaempferol (mg/day)                                            | 4.75 (2.98-7.58)           | 5.29 (2.91-8.66)           | 0.227          | 4.82 (2.83-8.40)            | 0.900          | 4.59 (2.50-7.85)            | 0.355          |
| Anthocyanidins (mg/day)                                        | 32.86 (16.82-64.22)        | 46.51 (22.34-80.04)        | 0.001          | 34.72 (16.76-70.99)         | 0.390          | 30.16 (16.11-70.78)         | 0.692          |
| Delphinidin (mg/day)                                           | 12.08 (4.56-23.44)         | 11.56 (3.55-24.49)         | 0.743          | 11.31 (5.02-21.88)          | 0.382          | 11.70 (3.04-22.91)          | 0.311          |
| Cyanidin (mg/day)                                              | 46.94 (22.12-101.15)       | 73.35 (30.44-139.23)       | 0.001          | 55.19 (22.22-118.63)        | 0.324          | 43.27 (19.44-103.76)        | 0.557          |
| Peonidin (mg/day)                                              | 1.15 (0.59-2.32)           | 1.30 (0.51-2.38)           | 0.499          | 1.28 (0.53-2.38)            | 0.958          | 1.08 (0.42-2.37)            | 0.208          |

Table S4. The proportion of adverse pregnancy events among BMI groups

| Adverse Pregnancy Events                           | Total (n=1785) | Normal [as control] | Obesity      | P value | Overweight   | P value | Underweight  | P value |
|----------------------------------------------------|----------------|---------------------|--------------|---------|--------------|---------|--------------|---------|
| <b>Morning sickness (n, %)</b>                     |                | □                   | □            | □       | □            | □       | □            | □       |
| Severe                                             | 79 (4.43%)     | 54 (4.88%)          | 5 (3.73%)    | >0.05   | 9 (2.28%)    | <0.05   | 11 (7.33%)   | >0.05   |
| Moderate                                           | 472 (26.44%)   | 280 (25.29%)        | 31 (23.14%)  | >0.05   | 117 (29.7%)  | >0.05   | 44 (29.33%)  | >0.05   |
| Mild                                               | 1059 (59.33%)  | 664 (59.98%)        | 77 (57.46%)  | >0.05   | 231 (58.63%) | >0.05   | 87 (58.00%)  | >0.05   |
| Normal                                             | 175 (9.8%)     | 109 (9.85%)         | 21 (15.67%)  | <0.05   | 37 (9.39%)   | >0.05   | 8 (5.34%)    | >0.05   |
| total                                              | 1785 (100%)    | 1107 (100%)         | 134 (100%)   | >0.05   | 394 (100%)   | >0.05   | 150 (100%)   | >0.05   |
| <b>Gestational diabetes mellitus (n, %)</b>        |                | □                   | □            | □       | □            | □       | □            | □       |
| Yes                                                | 476 (26.67%)   | 248 (22.4%)         | 63 (47.01%)  | <0.05   | 143 (36.29%) | <0.05   | 22 (14.67%)  | <0.05   |
| No                                                 | 1309 (73.33%)  | 859 (77.6%)         | 71 (52.99%)  | <0.05   | 251 (63.71%) | <0.05   | 128 (85.33%) | <0.05   |
| total                                              | 1785 (100%)    | 1107 (100%)         | 134 (100%)   | >0.05   | 394 (100%)   | >0.05   | 150 (100%)   | >0.05   |
| <b>Hypertensive disorders of pregnancy (n, %)</b>  |                | □                   | □            | □       | □            | □       | □            | □       |
| Yes                                                | 160 (8.96%)    | 63 (5.69%)          | 39 (29.1%)   | <0.05   | 55 (13.96%)  | <0.05   | 3 (2.00%)    | >0.05   |
| No                                                 | 1625 (91.04%)  | 1044 (94.31%)       | 95 (70.9%)   | <0.05   | 339 (86.04%) | <0.05   | 147 (98.00%) | >0.05   |
| total                                              | 1785 (100%)    | 1107 (100%)         | 134 (100%)   | >0.05   | 394 (100%)   | >0.05   | 150 (100%)   | >0.05   |
| <b>Thyroid disease (n, %)</b>                      |                | □                   | □            | □       | □            | □       | □            | □       |
| Yes                                                | 302 (16.92%)   | 192 (17.34%)        | 25 (18.66%)  | >0.05   | 59 (14.97%)  | >0.05   | 26 (17.33%)  | >0.05   |
| No                                                 | 1483 (83.08%)  | 915 (82.66%)        | 109 (81.34%) | >0.05   | 335 (85.03%) | >0.05   | 124 (82.67%) | >0.05   |
| total                                              | 1785 (100%)    | 1107 (100%)         | 134 (100%)   | >0.05   | 394 (100%)   | >0.05   | 150 (100%)   | >0.05   |
| <b>Delivery mode (n, %)</b>                        |                | □                   | □            | □       | □            | □       | □            | □       |
| Cesarean section                                   | 784 (43.92%)   | 452 (40.83%)        | 82 (61.19%)  | <0.05   | 205 (52.03%) | <0.05   | 45 (30.00%)  | <0.05   |
| Natural vaginal delivery                           | 1001 (56.08%)  | 655 (59.17%)        | 52 (38.81%)  | <0.05   | 189 (47.97%) | <0.05   | 105 (70.00%) | <0.05   |
| total                                              | 1785 (100%)    | 1107 (100%)         | 134 (100%)   | >0.05   | 394 (100%)   | >0.05   | 150 (100%)   | >0.05   |
| <b>Birth injury (n, %)</b>                         |                | □                   | □            | □       | □            | □       | □            | □       |
| Yes                                                | 687 (38.49%)   | 455 (41.1%)         | 39 (29.10%)  | <0.05   | 129 (32.74%) | <0.05   | 64 (42.67%)  | >0.05   |
| No                                                 | 1098 (61.51%)  | 652 (58.9%)         | 95 (70.9%)   | <0.05   | 265 (67.26%) | <0.05   | 86 (57.33%)  | >0.05   |
| total                                              | 1785 (100%)    | 1107 (100%)         | 134 (100%)   | >0.05   | 394 (100%)   | >0.05   | 150 (100%)   | >0.05   |
| <b>Preterm birth (n, %)</b>                        |                | □                   | □            | □       | □            | □       | □            | □       |
| Yes                                                | 95 (5.32%)     | 44 (3.97%)          | 13 (9.70%)   | <0.05   | 35 (8.88%)   | <0.05   | 3 (2.00%)    | >0.05   |
| No                                                 | 1690 (94.68%)  | 1063 (96.03%)       | 121 (90.30%) | <0.05   | 359 (91.12%) | <0.05   | 147 (98.00%) | >0.05   |
| total                                              | 1785 (100%)    | 1107 (100%)         | 134 (100%)   | >0.05   | 394 (100%)   | >0.05   | 150 (100%)   | >0.05   |
| <b>Fetal distress (n, %)</b>                       |                | □                   | □            | □       | □            | □       | □            | □       |
| Yes                                                | 202 (11.32%)   | 120 (10.84%)        | 14 (10.45%)  | >0.05   | 52 (13.20%)  | >0.05   | 16 (10.67%)  | >0.05   |
| No                                                 | 1583 (88.68%)  | 987 (89.16%)        | 120 (89.55%) | >0.05   | 342 (86.80%) | >0.05   | 134 (89.33%) | >0.05   |
| total                                              | 1785 (100%)    | 1107 (100%)         | 134 (100%)   | >0.05   | 394 (100%)   | >0.05   | 150 (100%)   | >0.05   |
| <b>Premature rupture of fetal membranes (n, %)</b> |                | □                   | □            | □       | □            | □       | □            | □       |
| Yes                                                | 402 (22.52%)   | 248 (22.40%)        | 29 (21.64%)  | >0.05   | 93 (23.60%)  | >0.05   | 32 (21.33%)  | >0.05   |
| No                                                 | 1383 (77.48%)  | 859 (77.60%)        | 105 (78.36%) | >0.05   | 301 (76.40%) | >0.05   | 118 (78.67%) | >0.05   |
| total                                              | 1785 (100%)    | 1107 (100%)         | 134 (100%)   | >0.05   | 394 (100%)   | >0.05   | 150 (100%)   | >0.05   |
| <b>Postpartum hemorrhage (n, %)</b>                |                | □                   | □            | □       | □            | □       | □            | □       |
| Yes                                                | 45 (2.52%)     | 27 (2.44%)          | 5 (3.73%)    | >0.05   | 10 (2.54%)   | >0.05   | 3 (2.00%)    | >0.05   |
| No                                                 | 1740 (97.48%)  | 1080 (97.56%)       | 129 (96.27%) | >0.05   | 384 (97.46%) | >0.05   | 147 (98.00%) | >0.05   |
| total                                              | 1785 (100%)    | 1107 (100%)         | 134 (100%)   | >0.05   | 394 (100%)   | >0.05   | 150 (100%)   | >0.05   |
| <b>Meconium-stained amniotic fluid (n, %)</b>      |                | □                   | □            | □       | □            | □       | □            | □       |
| Yes                                                | 184 (10.31%)   | 114 (10.30%)        | 11 (8.21%)   | >0.05   | 40 (10.15%)  | >0.05   | 19 (12.67%)  | >0.05   |
| No                                                 | 1601 (89.69%)  | 993 (89.70%)        | 123 (91.79%) | >0.05   | 354 (89.85%) | >0.05   | 131 (87.33%) | >0.05   |
| total                                              | 1785 (100%)    | 1107 (100%)         | 134 (100%)   | >0.05   | 394 (100%)   | >0.05   | 150 (100%)   | >0.05   |
| <b>Neonatal birth weight (n, %)</b>                |                | □                   | □            | □       | □            | □       | □            | □       |
| Macrosomia                                         | 72 (4.03%)     | 37 (3.34%)          | 8 (5.97%)    | >0.05   | 21 (5.33%)   | >0.05   | 6 (4.00%)    | >0.05   |
| Low birth weight                                   | 69 (3.87%)     | 37 (3.34%)          | 8 (5.97%)    | >0.05   | 22 (5.58%)   | <0.05   | 2 (1.33%)    | >0.05   |
| Normal birth weight                                | 1644 (92.1%)   | 1033 (93.32%)       | 118 (88.06%) | <0.05   | 351 (89.09%) | <0.05   | 142 (94.67%) | >0.05   |
| total                                              | 1785 (100%)    | 1107 (100%)         | 134 (100%)   | >0.05   | 394 (100%)   | >0.05   | 150 (100%)   | >0.05   |

Data were presented as counts with proportion (%).

**Table S5. The proportion of abnormal body weight gain among BMI Groups**

| <b>Gestational body weight gain</b> | <b>Total</b>    | <b>Normal<br/>[as control]</b> | <b>Obesity</b> | <b>P value</b> | <b>Overweight</b> | <b>P value</b> | <b>Underweight</b> | <b>P value</b> |
|-------------------------------------|-----------------|--------------------------------|----------------|----------------|-------------------|----------------|--------------------|----------------|
| <b>Total gain amount (n, %)</b>     |                 |                                |                |                |                   |                |                    |                |
| Excessive amount                    | 657<br>(36.80%) | 360<br>(32.52%)                | 58<br>(43.28%) | >0.05          | 204<br>(51.78%)   | <0.05          | 35<br>(23.33%)     | >0.05          |
| Inadequate amount                   | 252<br>(14.12%) | 123<br>(11.11%)                | 33<br>(24.63%) | <0.05          | 66<br>(16.75%)    | <0.05          | 30<br>(20.00%)     | <0.05          |
| Normal amount                       | 876<br>(49.08%) | 624<br>(56.37%)                | 43<br>(32.09%) | <0.05          | 124<br>(31.47%)   | <0.05          | 85<br>(56.67%)     | >0.05          |
| total                               | 1785<br>(100%)  | 1107<br>(100%)                 | 134<br>(100%)  |                | 394<br>(100%)     |                | 150<br>(100%)      |                |
| <b>Weekly gain rate (n, %)</b>      |                 |                                |                |                |                   |                |                    |                |
| Excessive rate                      | 611<br>(34.23%) | 320<br>(28.91%)                | 60<br>(44.77%) | <0.05          | 201<br>(51.01%)   | <0.05          | 30<br>(20.00%)     | >0.05          |
| Inadequate rate                     | 282<br>(15.80%) | 145<br>(13.10%)                | 33<br>(24.63%) | <0.05          | 65<br>(16.50%)    | >0.05          | 39<br>(26.00%)     | <0.05          |
| Normal rate                         | 892<br>(49.97%) | 642<br>(57.99%)                | 41<br>(30.60%) | <0.05          | 128<br>(32.49%)   | <0.05          | 81<br>(54.00%)     | >0.05          |
| total                               | 1785<br>(100%)  | 1107<br>(100%)                 | 134<br>(100%)  |                | 394<br>(100%)     |                | 150<br>(100%)      |                |

Data were presented as counts with proportion (%). Bonferroni correction was used.

## Supplemental References

1. Chinese Nutrition Society, *Dietary Guidelines for Chinese Residents*, People's Medical Publishing House, Beijing, 2022. (in Chinese)
2. National Institute for Nutrition and Health, Chinese Center for Disease Control and Prevention, *China Food Composition Table*, Peking University Medical Press, Beijing. (in Chinese)
3. Chinese Nutrition Society, *Dietary Reference Intakes for China*, People's Medical Publishing House, Beijing, 2023. (in Chinese)
4. W. T. Pan, S. Karatela, Q. G. Lu, L. Q. Xie, S. C. Wu, J. Jing and L. Cai, Association of diet quality during pregnancy with maternal glucose metabolism in Chinese women, *Br. J. Nutr.*, 2023, **130**, 958-965.
5. H. T. Chen, H. L. Li, Y. L. Cao, H. B. Qi, Y. Y. Ma, X. X. Bai, Y. Y. Zhao, L. Wu, C. X. Liu, J. Wei, H. Wang, Y. Jin, Z. L. Wang and Y. N. Zhu, Food intake and diet quality of pregnant women in China during the COVID-19 pandemic: A national cross-sectional study, *Front. Nutr.*, 2022, **9**, 853565.
6. S. S. Li, F. L. Lei, R. Zhang, D. M. Liu, P. F. Qu, Y. Cheng, X. Liu, F. Y. Chen, S. N. Dang and H. Yan, Socioeconomic disparity in the diet quality of pregnant women in Northwest China, *Asia Pac. J. Clin. Nutr.*, 2019, **28**, 330-340.
7. W. C. B. Zhang, Y. Q. He, F. Chen, C. Wang, X. Kang, Y. Peng and W. B. Li, Chinese dietary indices and glioma: New insights of a case-control study in the Chinese population, *Nutrients*, 2023, **15**, 3602.
8. A. Rivas, A. Romero, M. Mariscal-Arcas, C. Monteagudo, G. López, M. L. Lorenzo, F. M. Ocaña-Peinado and F. Olea-Serrano, Association between dietary antioxidant quality score (DAQs) and bone mineral density in Spanish women, *Nutr. Hosp.*, 2012, **27**, 1886-1893.
9. H. N. Luu, W. Wen, H. Li, Q. Dai, G. Yang, Q. Cai, Y.-B. Xiang, Y.-T. Gao, W. Zheng and X.-O. Shu, Are dietary antioxidant intake indices correlated to oxidative stress and inflammatory marker levels?, *Antioxid. Redox Signal.*, 2015, **22**, 951-959.
10. Y. Ding, X. Shi, G. Y. Li, Q. F. Liang, Z. Q. Yang, Y. X. Peng, H. Q. Deng and Z. X. Wang, Effects of dynamic zero COVID-19 policy on anxiety status and lifestyle changes of pregnant women in rural South China: a survey-based analysis by propensity score matching method, *Front. Public Health*, 2023, **11**, 1182619.
11. Y. Ding, F. P. Xu, C. R. Zhong, L. S. Tong, F. Li, Q. Li, R. J. Chen, X. Z. Zhou, X. T. Li, W. L. Cui, Y. Zhang, L. Huang, S. Z. Xu, C. Q. Liu, J. Y. Wu, X. Chen, Q. Gao, N. H. Yang and Z. X. Wang, Association between Chinese dietary guidelines compliance index for pregnant women and risks of pregnancy complications in the Tongji Maternal and Child Health Cohort, *Nutrients*, 2021, **13**, 829.
12. M. T. Yang, Q. Y. Feng, C. Chen, S. J. Chen, Y. S. Guo, D. P. Su, H. Chen, H. Sun, H. L. Dong and G. Zeng, Healthier diet associated with reduced risk of excessive gestational weight gain: A Chinese prospective cohort study, *Matern. Child Nutr.*, 2023, **19**, e13397.
13. W. X. Yang, N. Han, M. Y. Jiao, X. L. Chang, J. Liu, Q. L. Zhou and H. J. Wang, Maternal diet quality during pregnancy and its influence on low birth weight and small for gestational age: a birth cohort in Beijing, China, *Br. J. Nutr.*, 2023, **129**, 1360-1369.
14. K. Y. Tsoi, R. S. M. Chan, C. H. Tam, L. S. Li, W. H. Tam and R. C. W. Ma, Dietary patterns of Chinese pregnant women in Hong Kong, *Asia Pac. J. Clin. Nutr.*, 2022, **31**, 378-393.
15. K. Y. Tsoi, R. S. M. Chan, L. S. Li, F. M. McAuliffe, M. A. Hanson, W. H. Tam and R. C. W. Ma, Evaluation of dietary pattern in early pregnancy using the FIGO Nutrition Checklist compared to a food frequency questionnaire, *Int. J. Gynecol. Obstet.*, 2020, **151**, 37-44.
16. M. PB, G. SK, V. MZ and G. DC, Deteriorating dietary habits among adults with hypertension: DASH dietary concordance, NHANES 1988-1994 and 1999-2004, *Arch. Intern. Med.*, 2008, **168**, 308-314.
17. L. Hong, L. Y. Zhu, J. R. Zhang, Y. Q. Fu, X. Y. Qi and M. Zhao, Association of dietary inflammatory index with risk of gestational diabetes mellitus and preeclampsia: a systematic review and meta-analysis, *Br. J. Nutr.*, 2023, **131**, 54-62.
18. X. X. Gao, Q. X. Zheng, X. M. Jiang, X. Q. Chen, Y. P. Liao and Y. Q. Pan, The effect of diet quality on the risk of developing gestational diabetes mellitus: A systematic review and meta-analysis, *Front. Public Health*, 2023, **10**, 1062304.
19. N. Shivappa, S. E. Steck, T. G. Hurley, J. R. Hussey and J. R. Hébert, Designing and developing a literature-derived, population-based dietary inflammatory index, *Public Health Nutr.*, 2013, **17**, 1689-1696.
20. W. X. Zhong, A. Zhao, H. L. Lan, S. Mao, P. Li, H. Jiang, P. Y. Wang, I. M. Y. Szeto and Y. M. Zhang, Dietary diversity, micronutrient adequacy and bone status during pregnancy: A study in urban China from 2019 to 2020, *Nutrients*, 2022, **14**, 4690.
21. F. Agbozo, A. Abubakari, J. Der and A. Jahn, Maternal dietary intakes, red blood cell indices and risk for anemia in the first, second and third trimesters of pregnancy and at pre-delivery, *Nutrients*, 2020, **12**, 777.
22. Z. L. Shan, C. D. Rehm, G. Rogers, M. Y. Ruan, D. D. Wang, F. B. Hu, D. Mozaffarian, F. F. Zhang and S. N. Bhupathiraju, Trends in dietary carbohydrate, protein, and fat intake and diet quality among US adults, 1999-2016, *JAMA-J. Am. Med. Assoc.*, 2019, **322**, 1178-1187.
23. J. W. Yin, Y. Huang, G. Liu, L. Wang, Z. L. Shan and L. G. Liu, Trends in dietary macronutrient composition and diet quality among US adults with diagnosed and undiagnosed elevated glycemic status: a serial cross-sectional study, *Am. J. Clin. Nutr.*, 2022, **115**, 1602-1611.
24. W. Waksmańska, R. Bobiński, I. Ulman-Włodarz and A. Pielesz, The differences in the consumption of proteins, fats and carbohydrates in the diet of pregnant women diagnosed with arterial hypertension or arterial hypertension and hypothyroidism, *BMC Pregnancy Childbirth*, 2020, **20**, 29.
